# Supplementary material for: Circular RNA circCUL3 Accelerates the Warburg Effect Progression of Gastric Cancer through Regulating the STAT3/HK2 Axis
Source: PubMed Central journal article supplement — Mol Ther Nucleic Acids. 2020 Aug 25;22:310–8. doi: 10.1016/j.omtn.2020.08.023 (PMC7527579; doi:10.1016/j.omtn.2020.08.023), 2020-08-25
Supplement: mmc1.pdf [file mmc1.pdf]

**OMTN, Volume 22**

**Supplemental Information**

**Circular RNA circCUL3 Accelerates the  
Warburg Effect Progression of Gastric Cancer  
through Regulating the STAT3/HK2 Axis**

**Zhichen Pu, Maodi Xu, Xiaolong Yuan, Haitang Xie, and Jun Zhao**

**supplement Table S1.** Sequences of shRNA and qRT-PCR primers.

---

|               | 5'-3'                                                                            |
|---------------|----------------------------------------------------------------------------------|
| circCUL3      | forward, 5'-ACAACCTTCTTCAAACGCTAAATCA-3'<br>reverse, 5'-TCAGAAGGTCCCAAATGCTGT-3' |
| sh-circCUL3-1 | 5'-ACATGATGACCATGGATGAAA-3'                                                      |
| sh-circCUL3-2 | 5'-ACTAATGTACATGATGACCAT-3'                                                      |
| sh-circCUL3-3 | 5'-ATGTACATGATGACCATGGAT-3'                                                      |
| miR-515-5p    | Provided by RiboBio                                                              |
| STAT3         | forward, 5'-CAGCAGCTTGACACACGGTA-3'<br>reverse, 5'-AAACACCAAAGTGGCATGTGA-3'      |
| HK2           | forward, 5'-GAGCCACCACTCACCTACT-3'<br>reverse, 5'-CCAGGCATTTCGGCAATGTG-3'        |
| U6            | forward, 5'-AAAGCAAATCATCGGACGACC-3'<br>reverse, 5'-GTACAACACATTGTTTCCTCGGA-3'   |
| GAPDH         | forward, 5'-ACCCACTCCTCCACCTTTG-3'<br>reverse, 5'-CACCACCCTGTTGCTGTAG-3'         |

---

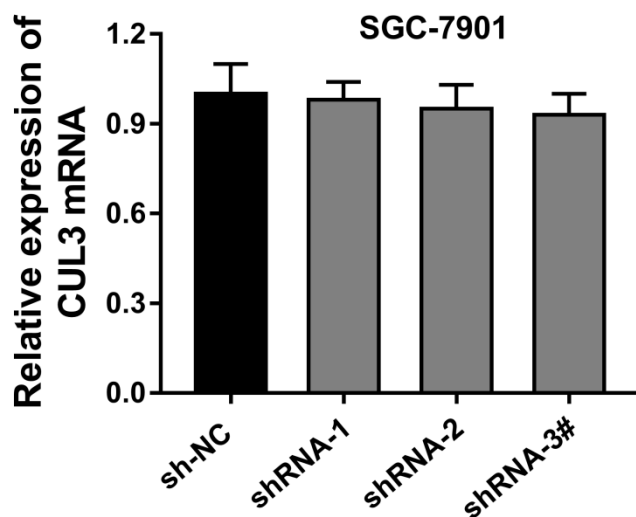

Figure S1. CUL3 mRNA expression in SGC-7901 cells transfected with shRNA-circCUL3.

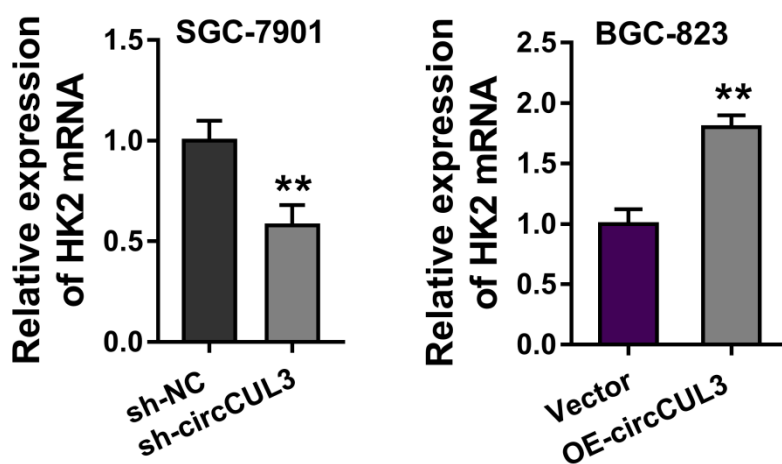

Figure S2. HK2 mRNA expression in SGC-7901 cells transfected with shRNA-circCUL3 and BGC-823 cells transfected with circCUL3 overexpression.
